# Supplementary material for: Heterosubtypic Protections against Human-Infecting Avian Influenza Viruses Correlate to Biased Cross-T-Cell Responses
Source: PubMed Central journal article supplement (PMC6083907; doi:10.1128/mbio.01408-18), 2018-08-07

A

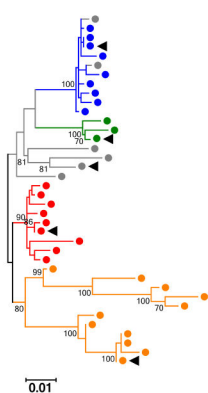

B

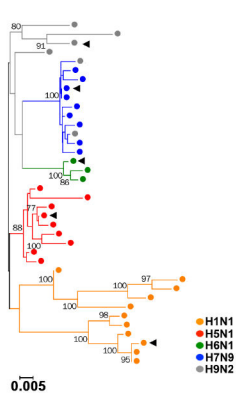

C

Difference VS C104

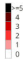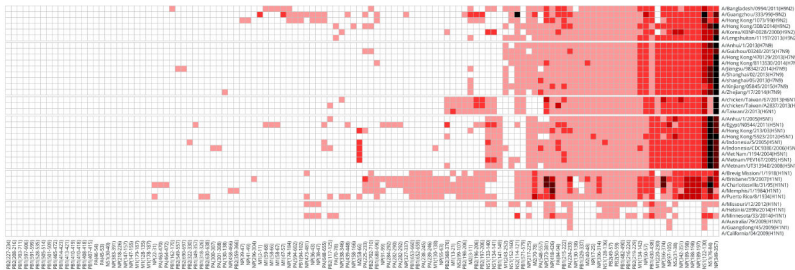

Supplement: mbo004184007sf3.pdf [file mbo004184007sf3.pdf]
